# Supplementary material for: Ammonium chloride–metal hydride based reaction cycle for vehicular applications
Source: Royal Society of Chemistry journal article supplement (doi:10.1039/c9ta00192a), 2019-01-01
Supplement: c9ta00192a1.pdf [file c9ta00192a1.pdf]

Electronic Supplemental Information for:

**Ammonium chloride-metal hydride based reaction cycle for vehicular applications**

Helen G. Stewart,<sup>a</sup> Terry D. Humphries,<sup>a</sup> Drew A. Sheppard,<sup>a</sup> Mariana S. Tortoza,<sup>a</sup> M. Veronica Sofianos,<sup>a</sup> Shaomin Liu,<sup>b</sup> and Craig E. Buckley<sup>a</sup>

- a. Department of Physics and Astronomy, Fuels and Energy Technology Institute, Curtin University, GPO Box U1987, Perth, WA 6845, Australia  
 b. Department of Chemical Engineering, Curtin University, GPO Box U1987, Perth, WA, 6845, Australia.

**Table S1.** Predicted reaction pathways and calculated standard enthalpy of reaction for each of the systems studied.

| Sample Reaction Path                                                                                                                                                               | Calculated $\Delta H^\circ$ at 25°C/mol $\text{NH}_4\text{Cl}$ of reaction (kJ/mol) | Theoretical reaction weight loss (%) |               |           |
|------------------------------------------------------------------------------------------------------------------------------------------------------------------------------------|-------------------------------------------------------------------------------------|--------------------------------------|---------------|-----------|
|                                                                                                                                                                                    |                                                                                     | $\text{H}_2$                         | $\text{NH}_3$ | Total     |
| $\text{NH}_4\text{Cl}_{(s)} + \text{NaH}_{(s)} \rightarrow \text{NaCl}_{(s)} + \text{H}_{2(g)} + \text{NH}_{3(g)}$                                                                 | -86.1                                                                               | 2.6                                  | 21.9          | 24.6      |
| $\text{NH}_4\text{Cl}_{(s)} + \text{NaH}_{(s)} + \text{PdCl}_{2(s)} \rightarrow \text{NaCl}_{(s)} + \text{H}_{2(g)} + \text{NH}_{3(g)} + \text{PdCl}_{2(s)}$<br>(1mol% / 10 mol %) | -86.1                                                                               | 2.6/2.1                              | 21.7/17.9     | 24.3/20.0 |
| $\text{NH}_4\text{Cl}_{(s)} + \text{NaNH}_{2(s)} \rightarrow \text{NaCl}_{(s)} + 2\text{NH}_{3(g)}$                                                                                | -64.6                                                                               | 0.0                                  | 36.8          | 36.8      |
| $2\text{NH}_4\text{Cl}_{(s)} + \text{MgH}_{2(s)} \rightarrow \text{MgCl}_{2(s)} + 2\text{H}_{2(g)} + 2\text{NH}_{3(g)}$                                                            | -15.7                                                                               | 3.0                                  | 25.6          | 28.6      |
| $\text{NH}_4\text{Cl}_{(s)} + \text{LiH}_{(s)} \rightarrow \text{LiCl}_{(s)} + \text{H}_{2(g)} + \text{NH}_{3(g)}$                                                                 | -49.1                                                                               | 3.3                                  | 27.7          | 31.0      |
| $\text{NH}_4\text{Cl}_{(s)} + \text{LiNH}_{2(s)} \rightarrow \text{LiCl}_{(s)} + \text{H}_{2(g)} + \text{NH}_{3(g)}$                                                               | -6.1                                                                                | 0.0                                  | 44.5          | 44.5      |
| $2\text{NH}_4\text{Cl}_{(s)} + \text{CaH}_{2(s)} \rightarrow \text{CaCl}_{2(s)} + 2\text{H}_{2(g)} + 2\text{NH}_{3(g)}$                                                            | -40.6                                                                               | 2.7                                  | 22.8          | 25.5      |

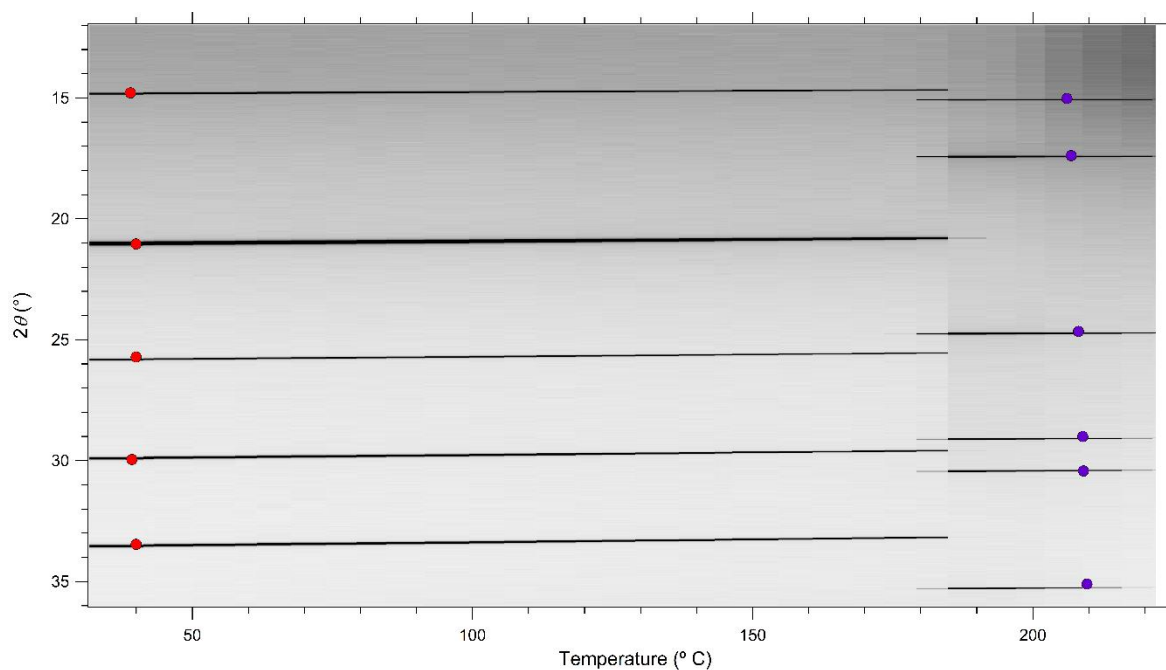

**Fig. S1.** In situ SR-XRD data for NH<sub>4</sub>Cl. ● LT-NH<sub>4</sub>Cl and ● HT-NH<sub>4</sub>Cl.  $\Delta T/t = 5$  °C/min.  $\lambda = 1.0003896(1)$  Å.

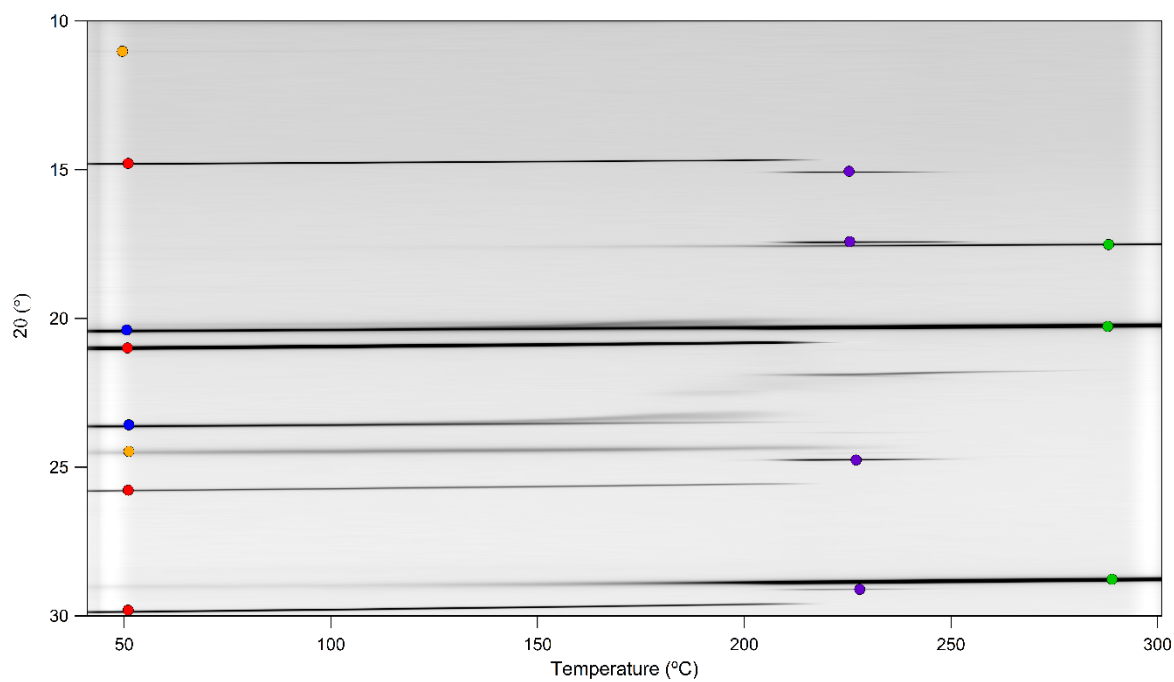

**Fig. S2.** In situ SR-XRD data for NH<sub>4</sub>Cl + NaH. ● LT-NH<sub>4</sub>Cl, ● NaH, ● NaOH, ● NaCl and ● HT-NH<sub>4</sub>Cl.  $\Delta T/t = 5$  °C/min.  $\lambda = 1.0003896(1)$  Å.

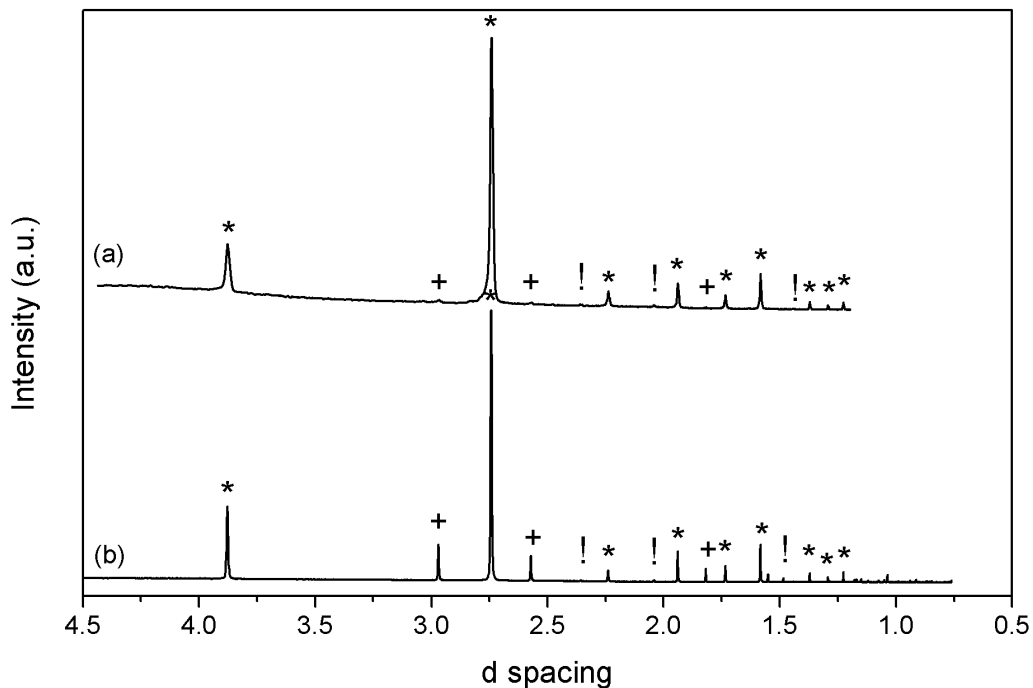

**Fig. S3.** XRD data for  $\text{NH}_4\text{Cl} + \text{LiH}$  collected at room temperature. (a) Data collected directly after ball milling on Bruker AXS D8 Advance Discover XRD System ( $\lambda = 1.5406 \text{ \AA}$ ), (b) data collected 8 months after ball milling using Synchrotron radiation ( $\lambda = 1.0003896(1) \text{ \AA}$ ). \* =  $\text{NH}_4\text{Cl}$ , ! =  $\text{LiH}$ , + =  $\text{LiCl}$ .

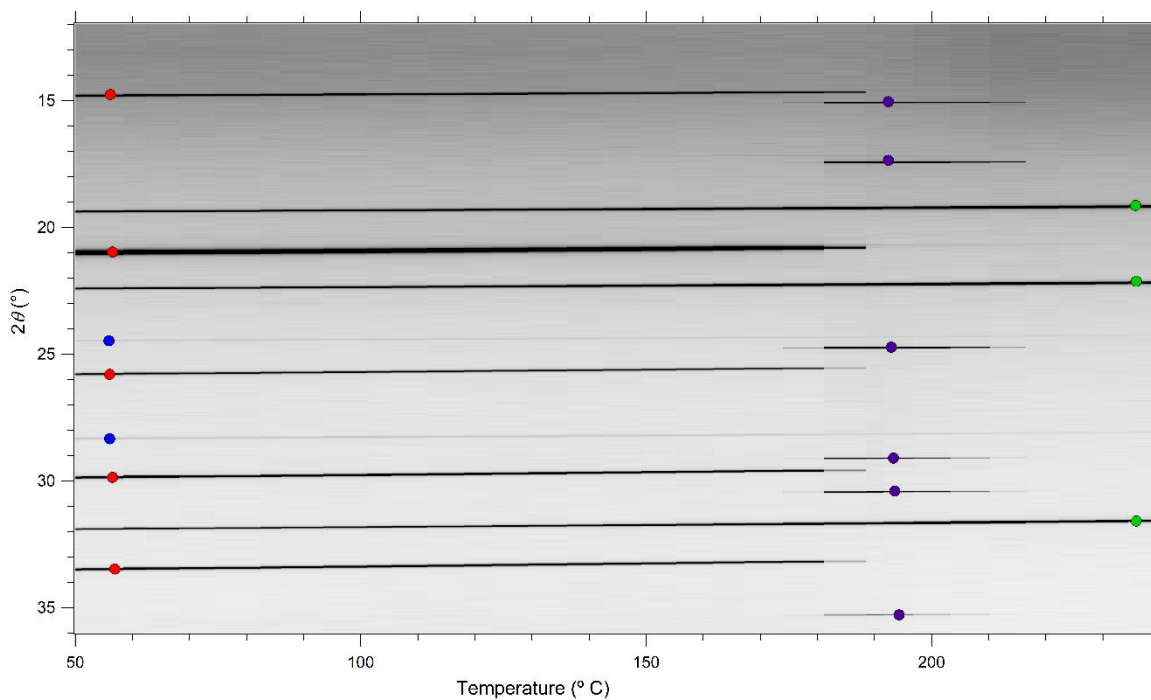

**Fig. S4.** In situ SR-XRD data for  $\text{NH}_4\text{Cl} + \text{LiH}$ . ● LT- $\text{NH}_4\text{Cl}$ , ● LiH, ● LiCl and ● HT- $\text{NH}_4\text{Cl}$ .  $\Delta T/t = 5 \text{ }^\circ\text{C}/\text{min}$ .  $\lambda = 1.0003896(1) \text{ \AA}$ .

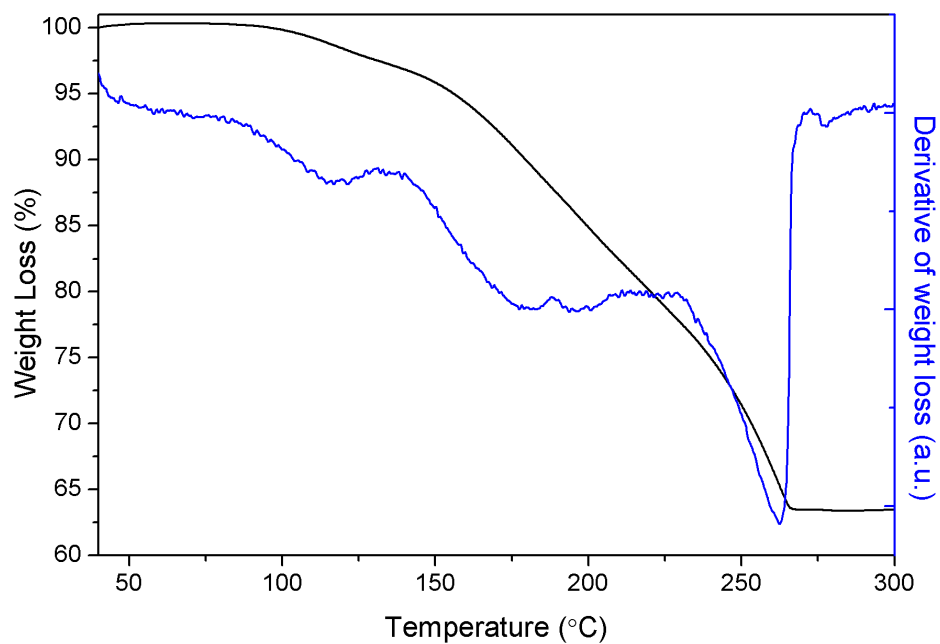

**Fig. S5.** TGA and first derivative of the TGA data for  $\text{NH}_4\text{Cl} + \text{LiH}$ .  $\Delta T/t = 5^\circ\text{C}/\text{min}$ .

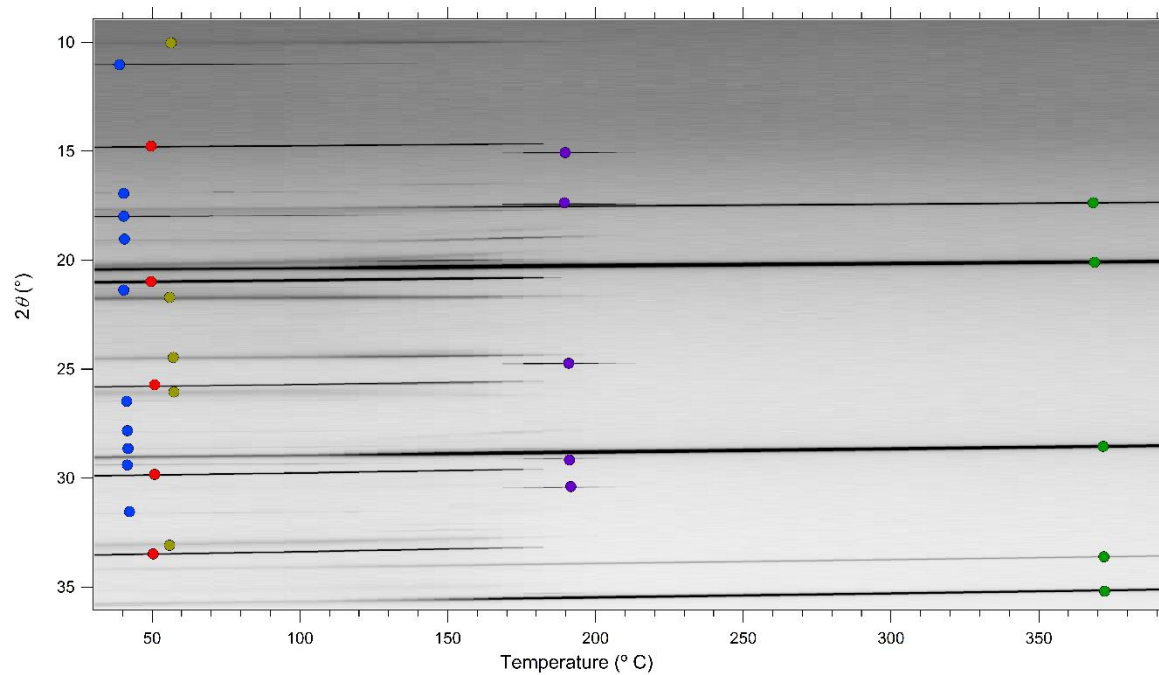

**Fig. S6.** In situ SR-XRD data for  $\text{NH}_4\text{Cl} + \text{NaNH}_2$ . ●  $\text{LT-NH}_4\text{Cl}$ , ●  $\text{NaNH}_2$ , ●  $\text{NaCl}$ , ●  $\text{NaOH}$ , and ●  $\text{HT-NH}_4\text{Cl}$ .  $\Delta T/t = 5^\circ\text{C}/\text{min}$ .  $\lambda = 1.0003896(1) \text{ \AA}$ .

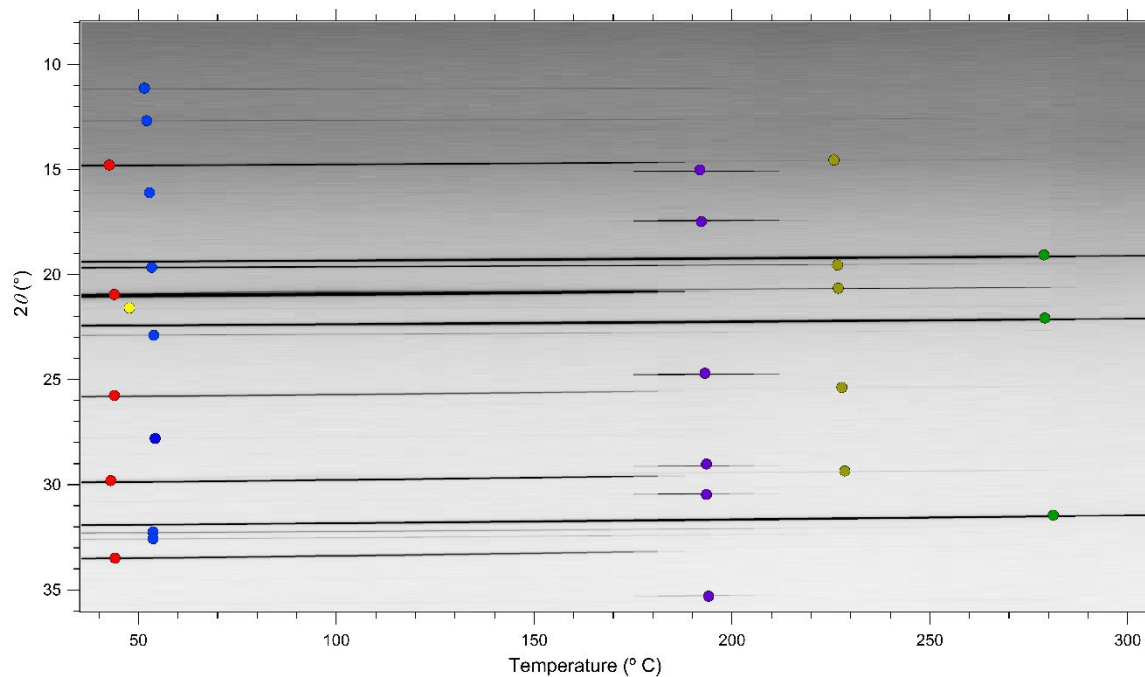

**Fig. S7.** In situ SR-XRD data for  $\text{NH}_4\text{Cl} + \text{LiNH}_2$ . ● LT- $\text{NH}_4\text{Cl}$ , ●  $\text{LiNH}_2$ , ●  $\text{Li}_2\text{O}$ , ●  $\text{LiCl}$ , ● HT- $\text{NH}_4\text{Cl}$  and ● unknown.  $\Delta T/t = 5^\circ\text{C}/\text{min}$ .  $\lambda = 1.0003896(1) \text{ \AA}$ .

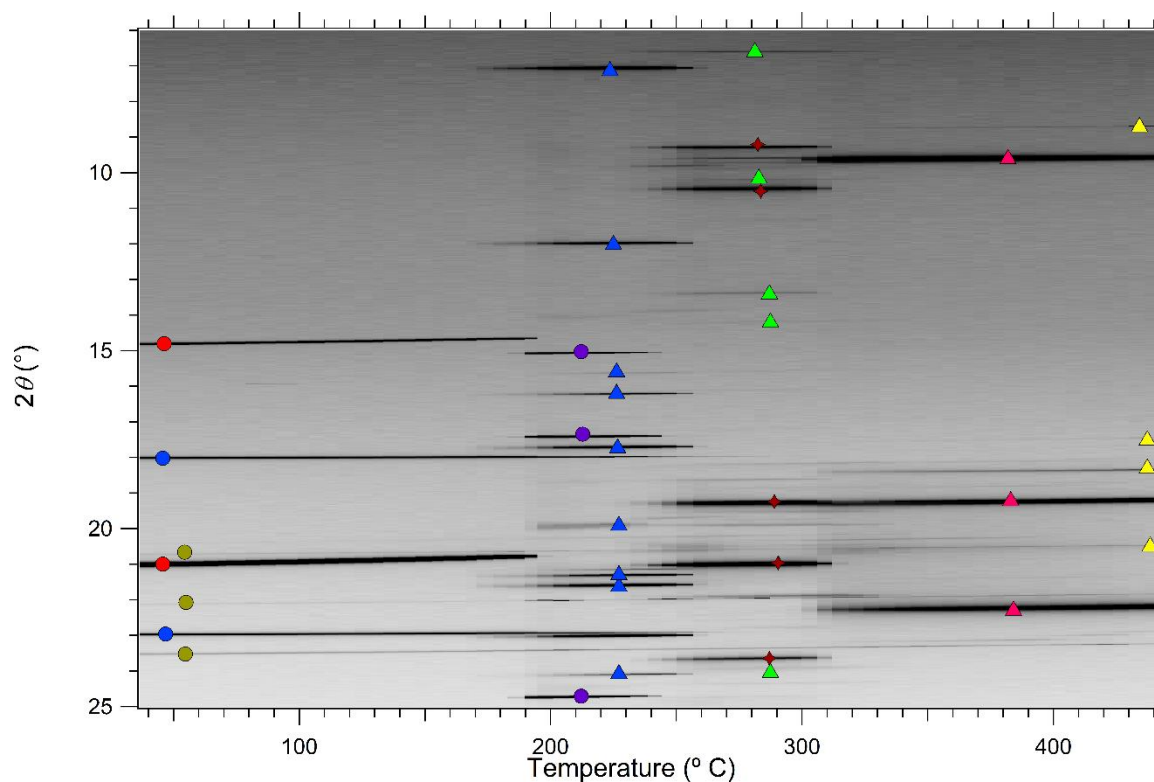

**Fig. S8.** In situ SR-XRD data for  $\text{NH}_4\text{Cl} + \text{MgH}_2$ . ● LT- $\text{NH}_4\text{Cl}$ , ●  $\text{MgH}_2$ , ●  $\text{Mg}$ , ▲  $(\text{NH}_4)_2\text{MgCl}_4$ , ● HT- $\text{NH}_4\text{Cl}$ , ◆ unknown, ▲ unknown, ▲ unknown and ▲  $\text{MgCl}_2$ .  $\Delta T/t = 5^\circ\text{C}/\text{min}$ .  $\lambda = 1.0003896(1) \text{ \AA}$ .

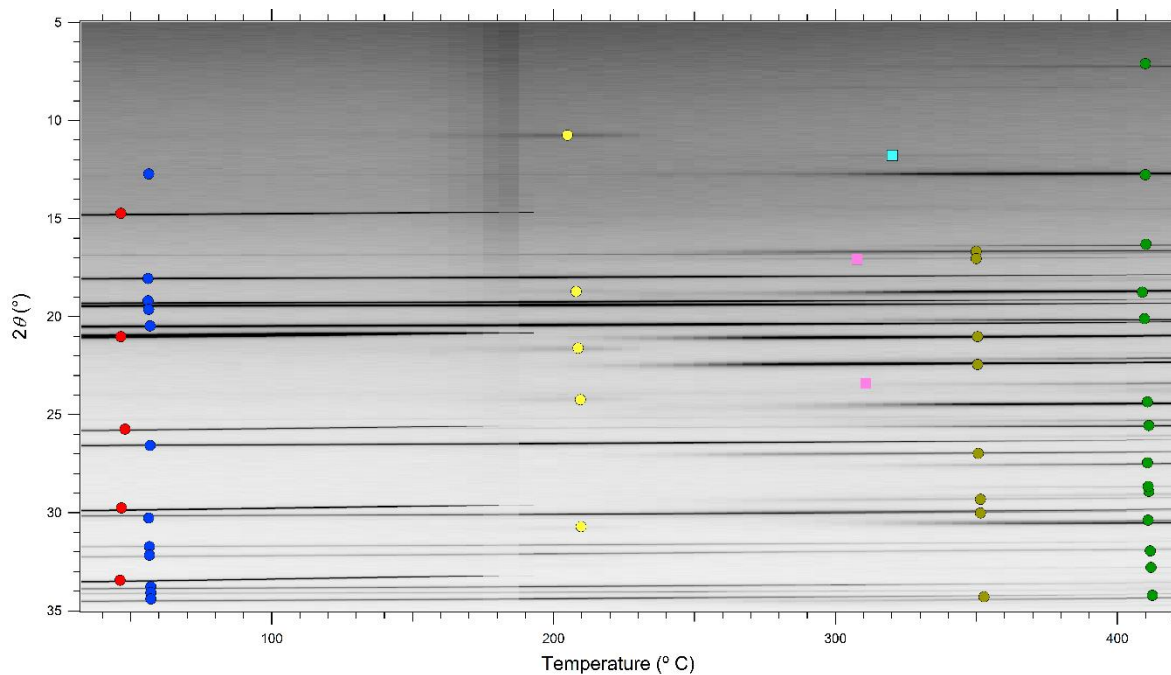

**Fig. S9.** In situ SR-XRD data for  $\text{NH}_4\text{Cl} + \text{CaH}_2$ . ● LT- $\text{NH}_4\text{Cl}$ , ●  $\text{CaH}_2$ , ▲  $\text{NH}_4\text{CaCl}_3$ , ■ unknown, ■ unknown, ●  $\text{CaHCl}$  and ●  $\text{CaCl}_2$ .  $\Delta T/t = 5^\circ\text{C}/\text{min}$ .  $\lambda = 1.0003896(1) \text{ \AA}$ .

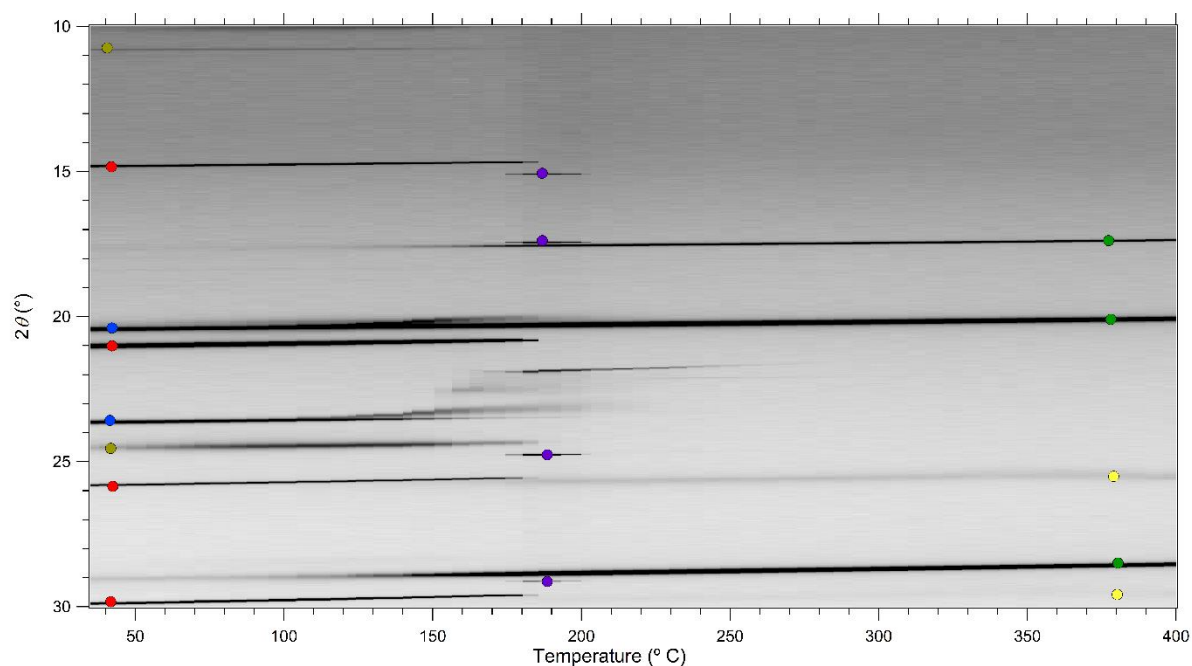

**Fig. S10.** In situ SR-XRD data for  $\text{NH}_4\text{Cl} + \text{NaH} + \text{PdCl}_2$  (1 mol%). ● LT- $\text{NH}_4\text{Cl}$ , ●  $\text{NaH}$ , ●  $\text{NaOH}$ , ●  $\text{NaCl}$ , ●  $\text{Pd}$  and ● HT- $\text{NH}_4\text{Cl}$ .  $\Delta T/t = 5^\circ\text{C}/\text{min}$ .  $\lambda = 1.0003896(1) \text{ \AA}$ .

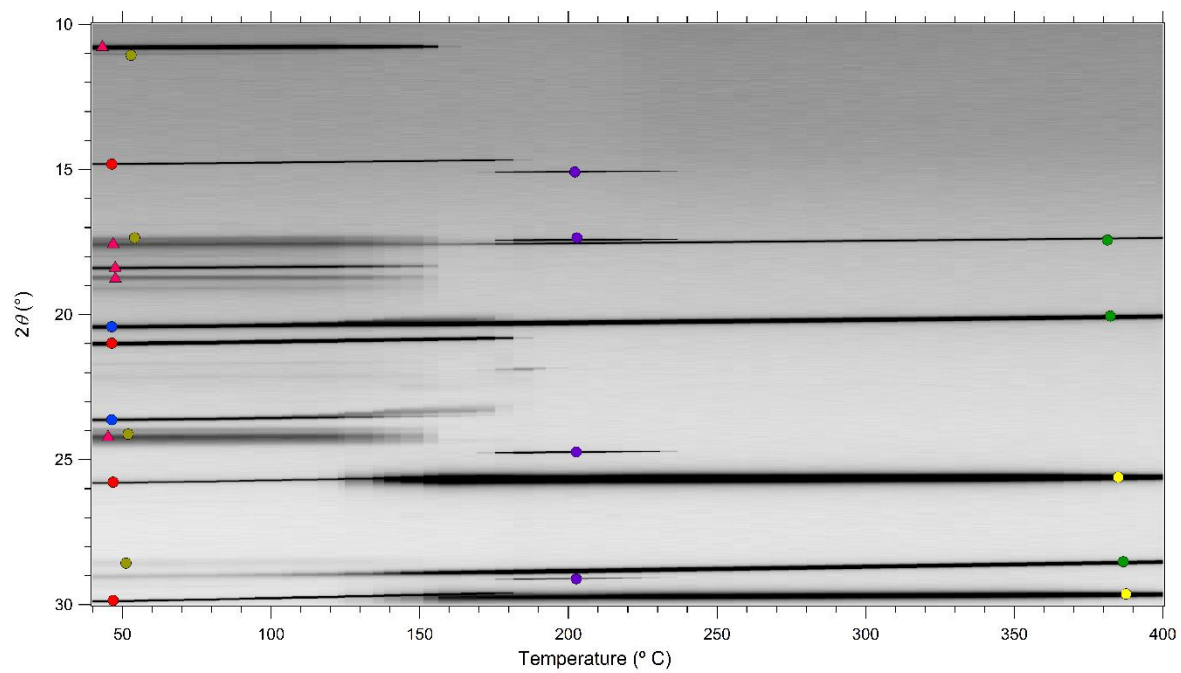

**Fig. S11.** In situ SR-XRD data for  $\text{NH}_4\text{Cl} + \text{NaH} + \text{PdCl}_2$  (10 mol%). ● LT- $\text{NH}_4\text{Cl}$ , ● NaH, ● NaOH, ● NaCl, ▲ PdCl<sub>2</sub>, ● Pd and ● HT- $\text{NH}_4\text{Cl}$ .  $\Delta T/t = 5$  °C/min.  $\lambda = 1.0003896(1)$  Å.
